# Supplementary material for: Induction of Cancer Stem Cell Properties in Colon Cancer Cells by Defined Factors
Source: PLOS journal article supplement (doi:10.1371/journal.pone.0101735), 2014-07-09

Figure S6

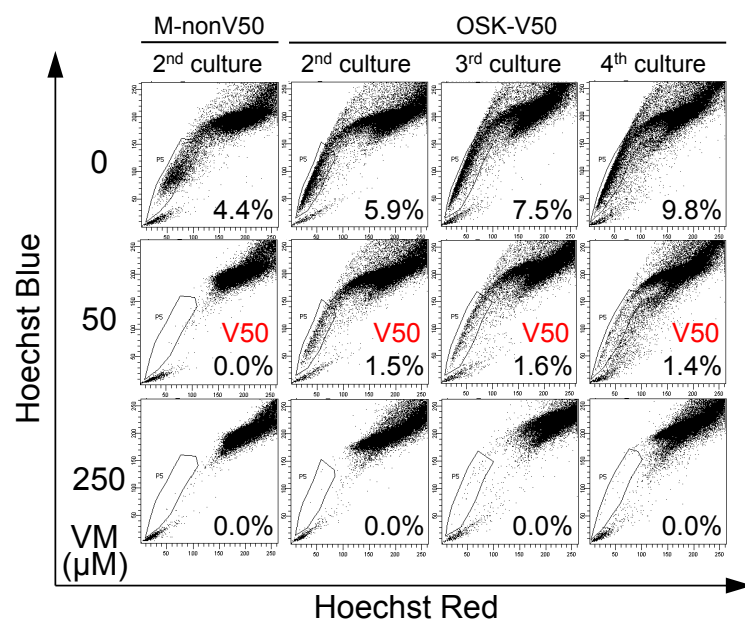

Supplement: S6 (10.1371/journal.pone.0101735.s006) [file journal.pone.0101735.s006]
