# Supplementary material for: Induction of Cancer Stem Cell Properties in Colon Cancer Cells by Defined Factors
Source: PLOS journal article supplement (doi:10.1371/journal.pone.0101735), 2014-07-09
Supplement: S10 (10.1371/journal.pone.0101735.s010) [file journal.pone.0101735.s010]

**Table S2**

Summary of tumor formation derived from transduced DLD-1 cells

| Cell name  | Tumor formation      |
|------------|----------------------|
|            | Injected cell number |
|            | 1 x10 <sup>5</sup>   |
| Wt-DLD-1   | 50% (4/8)            |
| Mock-DLD-1 | 50% (6/12)           |
| OSK-DLD-1  | 91.6% (11/12)        |
